# Supplementary material
Source: publisher figshare collection journal article supplement (https://acs.figshare.com/ndownloader/files/4663756)

# Supporting Information

## Optically Switchable Chelates: Optical control and sensing of metal ions

*Tomoyo Sakata, David Jackson, Shu Mao and Gerard Marriot\**

*Department of Physiology, University of Wisconsin, 1300 University Ave., Madison, WI*

Marriott@physiology.wisc.edu

**table of contents:** <sup>1</sup>H NMR spectra measured at 300 MHz

|                                                                                              |    |
|----------------------------------------------------------------------------------------------|----|
| nitrosalicylaldehyde (1a) (crude product, containing Et <sub>3</sub> N)                      | S2 |
| nitrosalicylaldehyde (1b) (crude product, containing Et <sub>3</sub> N)                      | S3 |
| nitroBIPS (2a)                                                                               | S4 |
| nitroBIPS (2b)                                                                               | S5 |
| nitroBIPS (6)                                                                                | S6 |
| nitroBIPS-8-DA (3) (with addition of Et <sub>3</sub> N to neutralize and improve solubility) | S7 |
| nitroBIPS-8-TriAM (8)                                                                        | S8 |

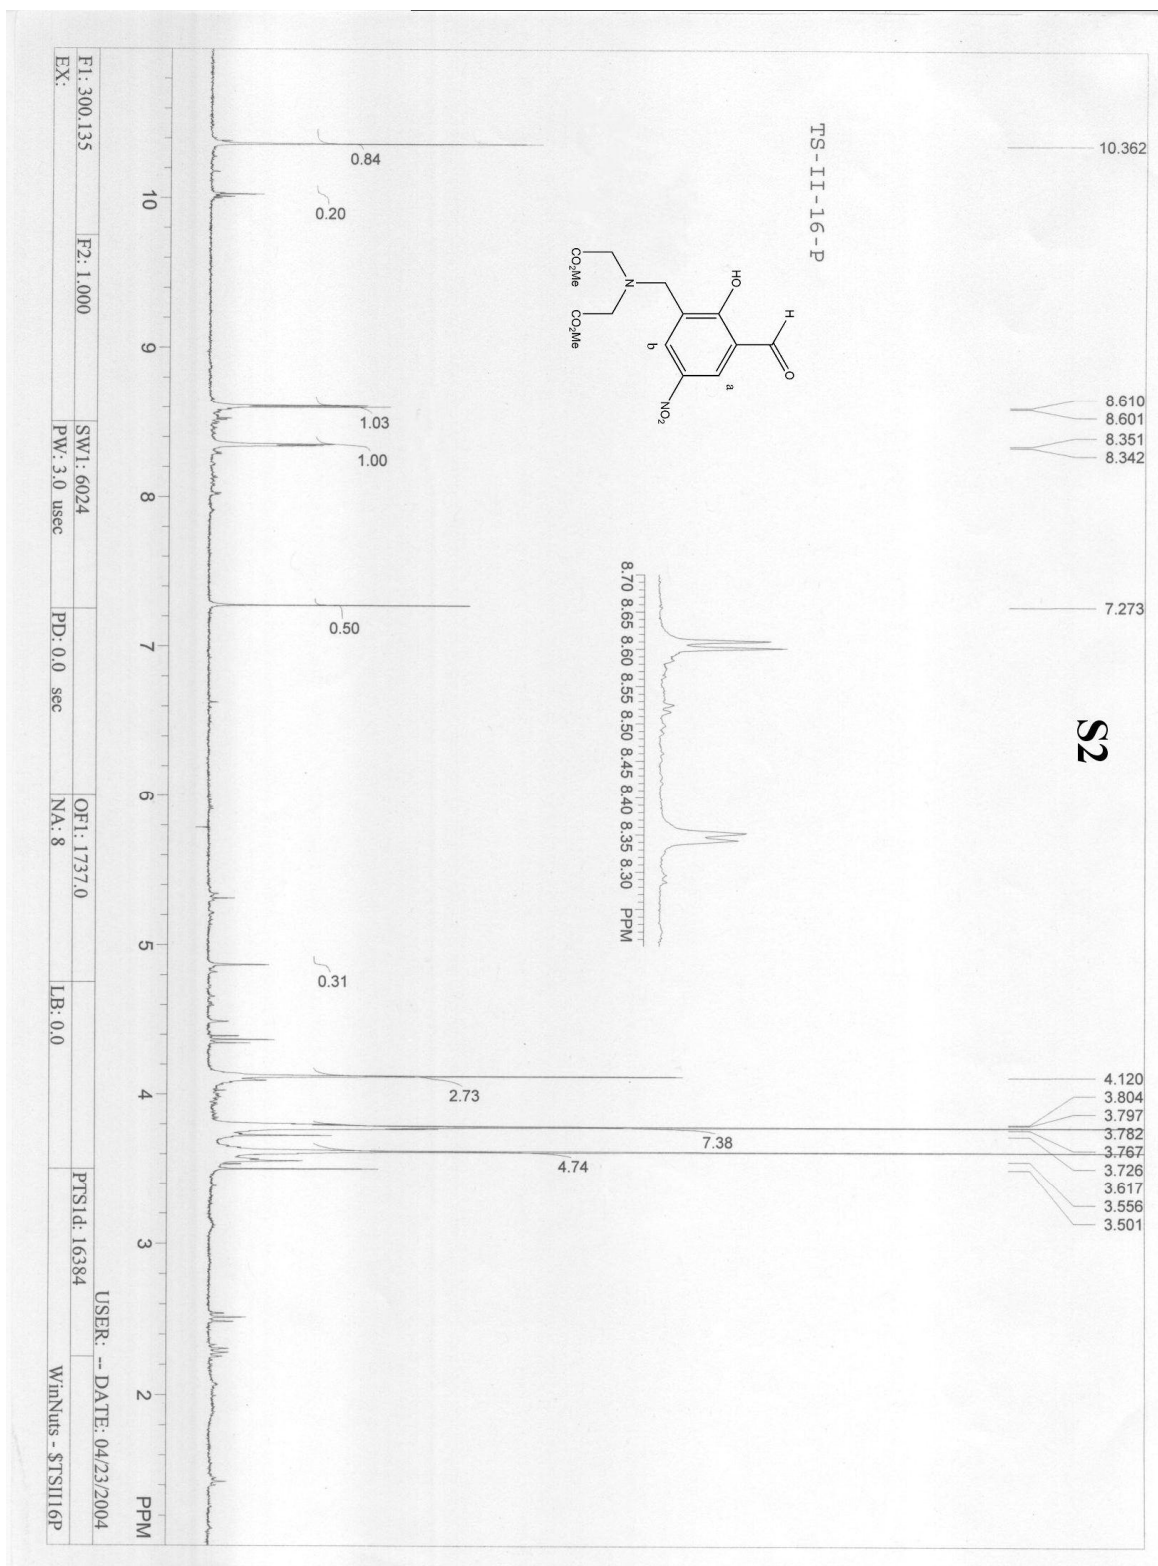

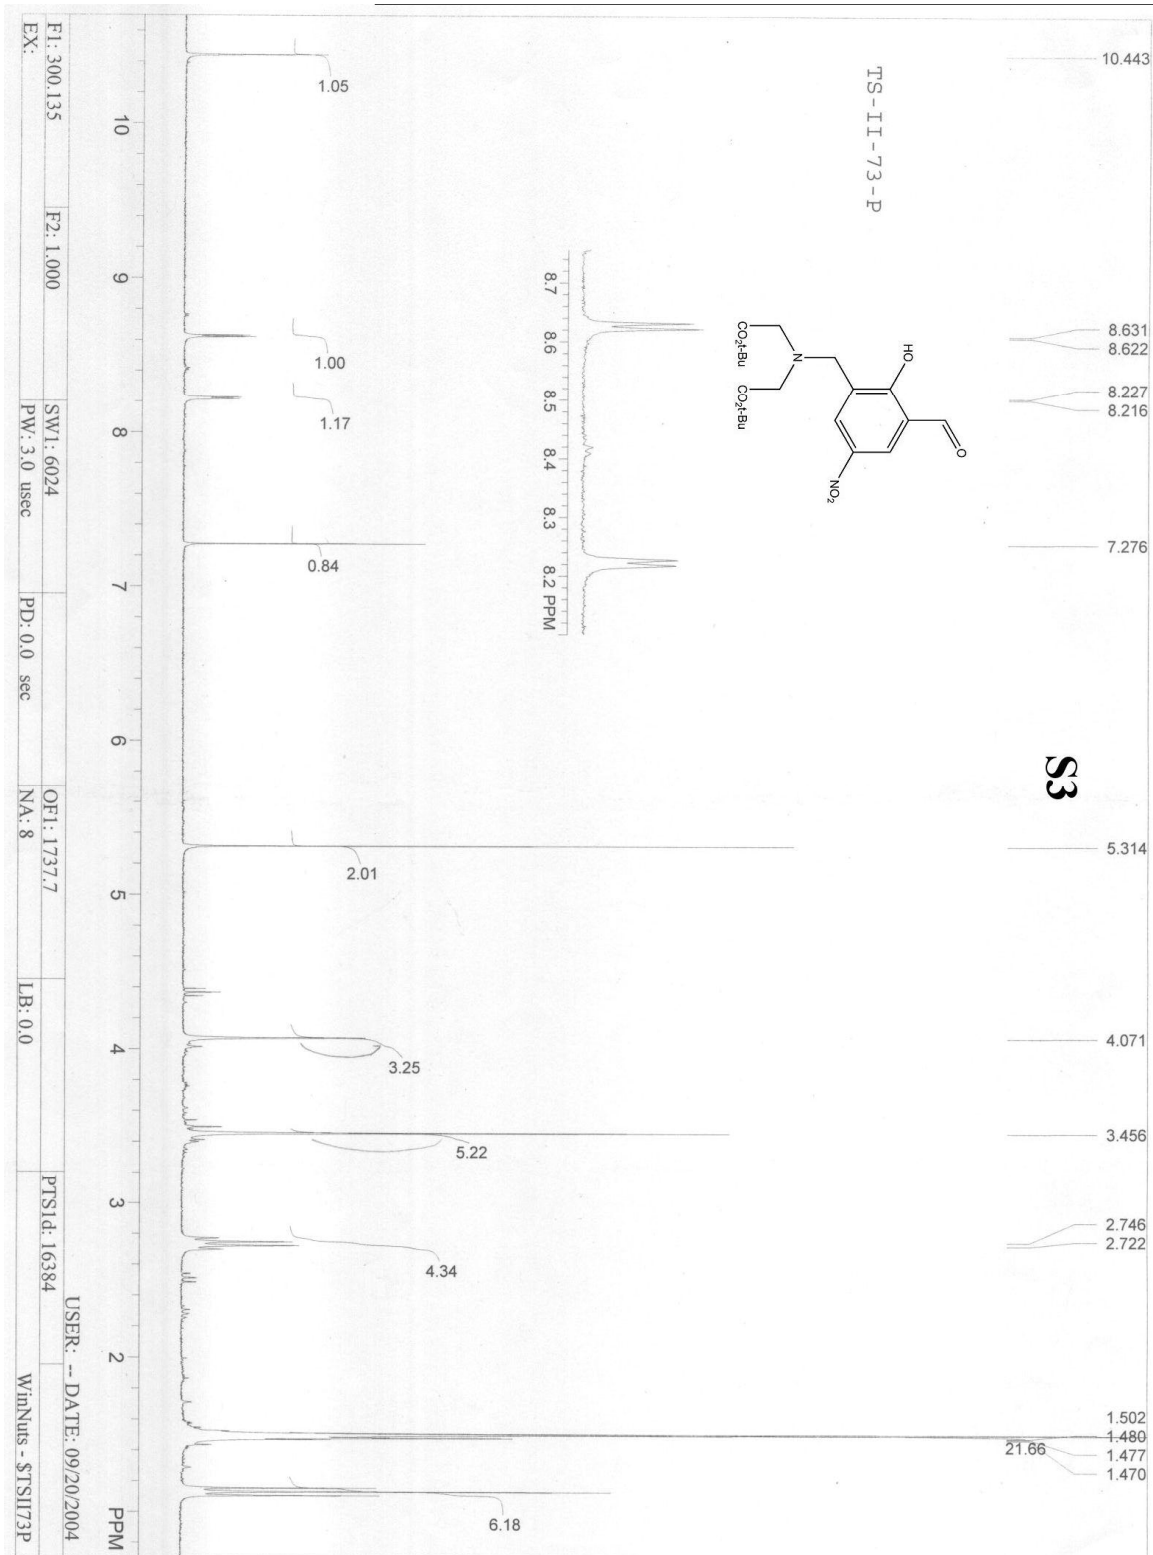

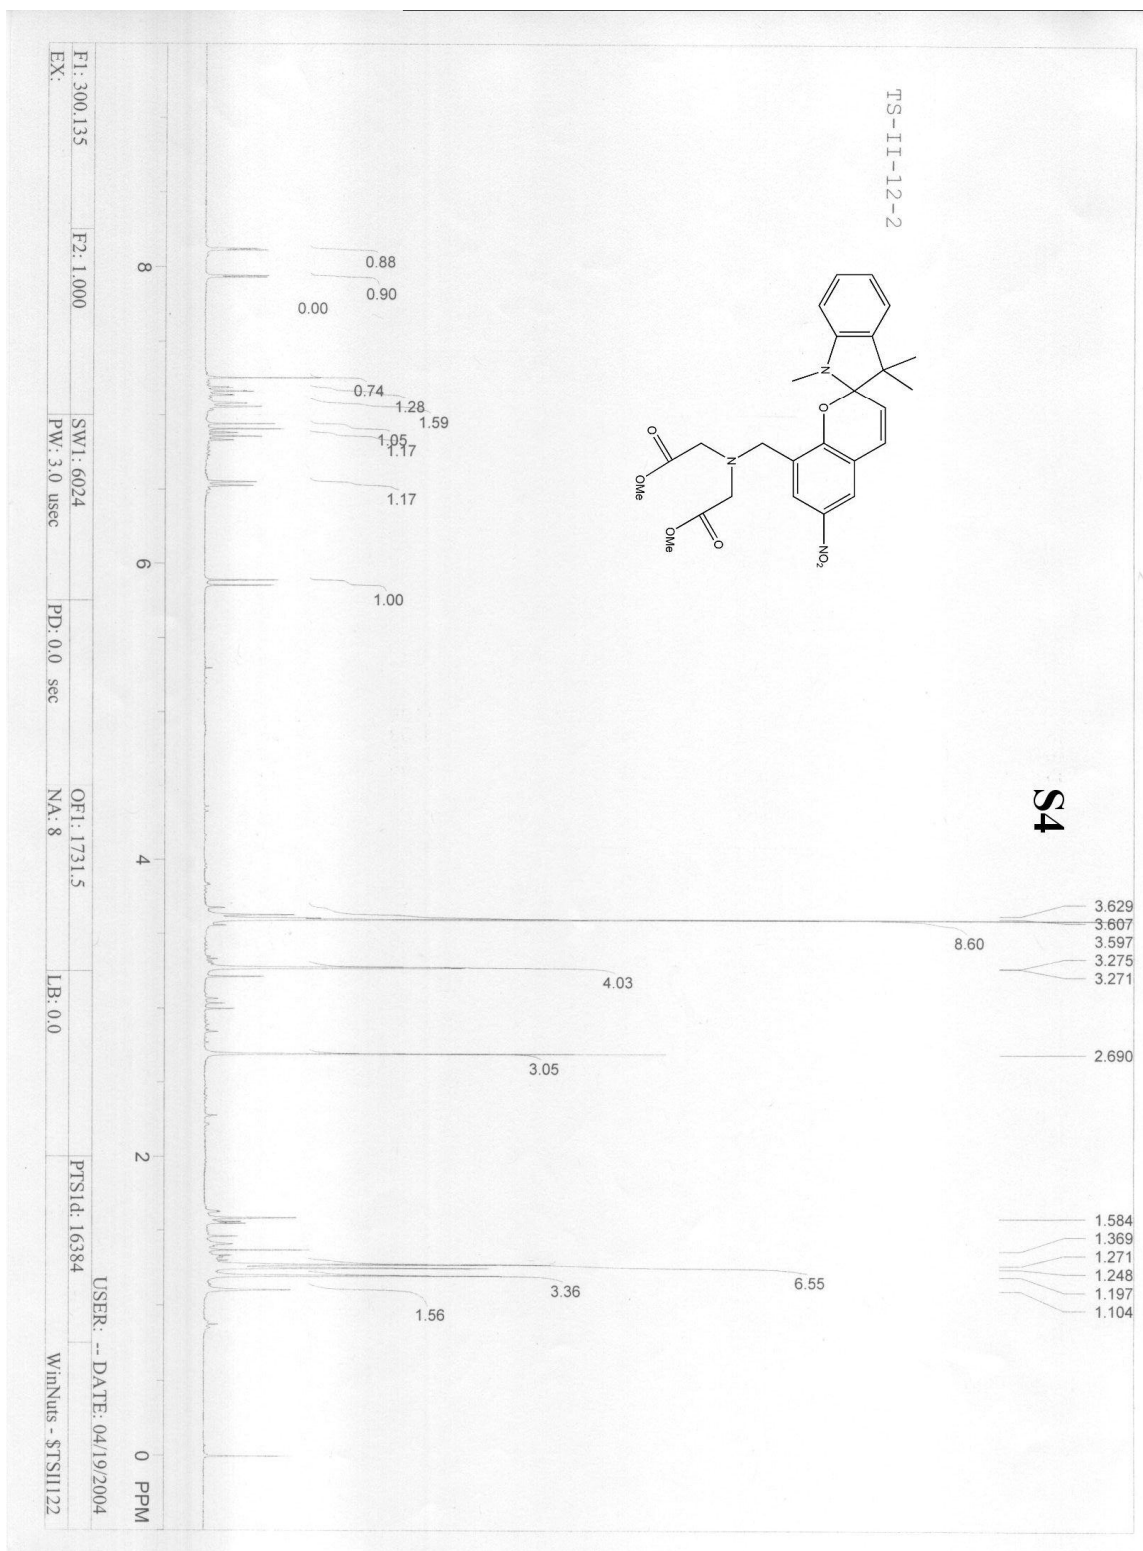

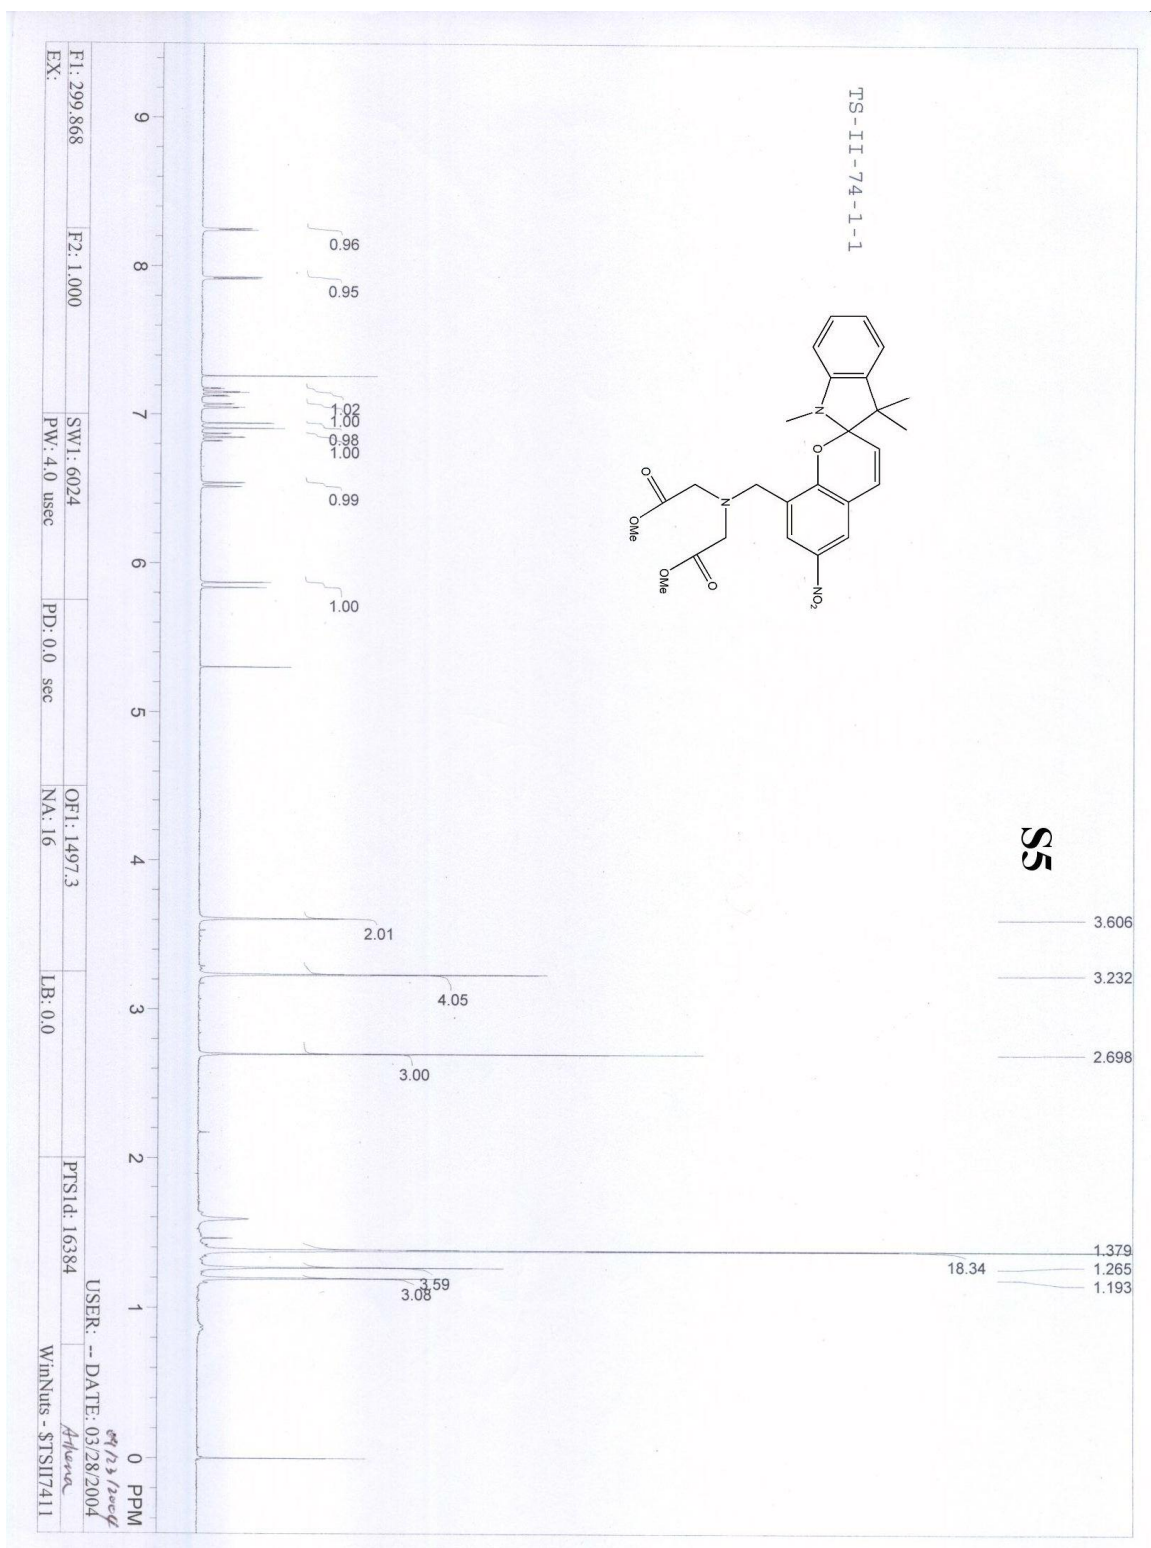

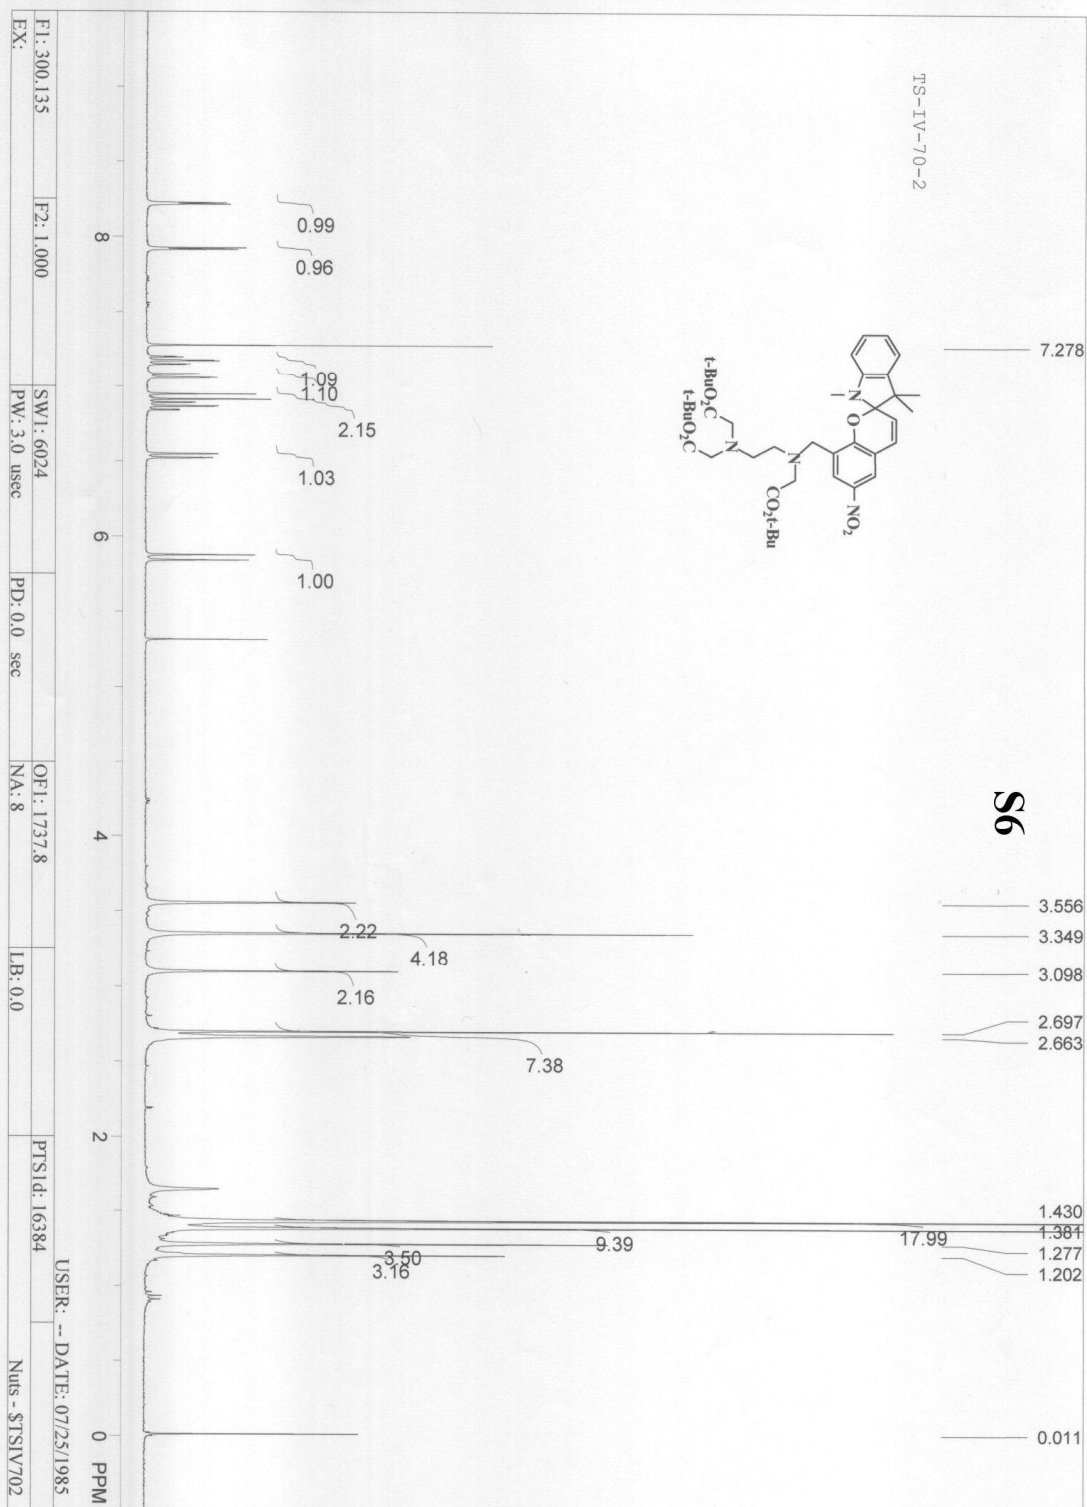



S7

TS-IV-38-5

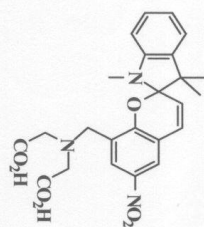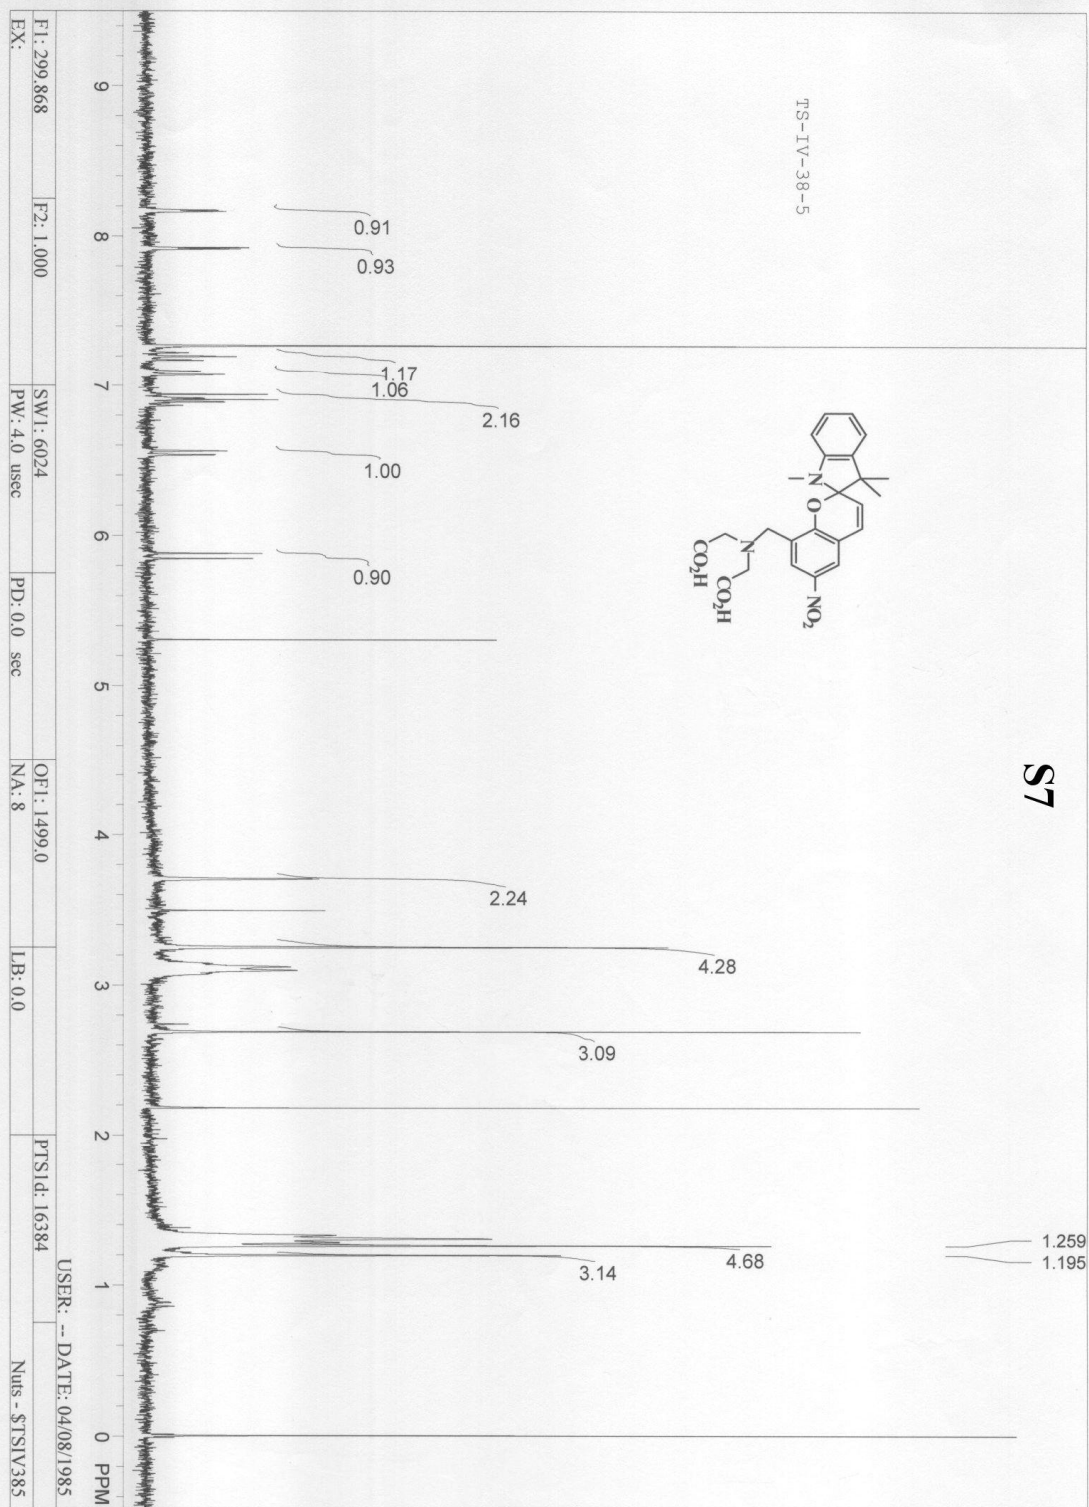

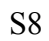

Supplement: Supplementary file 1 [file 4663756]
